# Supplementary material
Source: PubMed Central journal article supplement (PMC6292518)
Supplement: NIHMS997017-supplement-Suuplementary_data.pdf [file NIHMS997017-supplement-Suuplementary_data.pdf]

## Supplemental Material

### High throughput flow cytometry identifies small molecule inhibitors for drug repurposing in T-ALL

Dominique R. Perez<sup>1,2,4</sup>, Christian K. Nickl<sup>3,4</sup>, Anna Waller<sup>1,2,4</sup>, Cristina Delgado-Martin<sup>5</sup>, Travis Woods<sup>1,2,4</sup>, Nitesh D. Sharma<sup>3,4</sup>, Michelle L Hermiston<sup>5</sup>, Mignon L. Loh<sup>5</sup>, Stephen P. Hunger<sup>6</sup>, Stuart S. Winter<sup>7</sup>, Alexandre Chigaev<sup>1,2,4</sup>, Bruce Edwards<sup>1,2,4</sup>, Larry A. Sklar<sup>1,2,4,#</sup>, Ksenia Matlawska-Wasowska<sup>3,4,#</sup>

<sup>1</sup> Department of Pathology, Health Sciences Center, University of New Mexico, Albuquerque, NM, USA

<sup>2</sup> Center for Molecular Discovery, Health Sciences Center, University of New Mexico Albuquerque, NM, USA

<sup>3</sup> Department of Pediatrics, Division of Pediatric Research, Health Sciences Center, University of New Mexico, Albuquerque, NM, USA

<sup>4</sup> University of New Mexico Comprehensive Cancer Center, Albuquerque, NM 87131, USA

<sup>5</sup> Department of Pediatrics, University of California, San Francisco, Benioff Children's Hospital, San Francisco, CA, USA

<sup>6</sup> Department of Pediatrics and the Center for Childhood Cancer Research, Children's Hospital of Philadelphia and the Perelman School of Medicine at the University of Pennsylvania, Philadelphia, Pennsylvania, USA

<sup>7</sup> Children's Minnesota Research Institute, Children's Minnesota, Minneapolis, Minnesota, USA

# These authors contributed equally to this work

#### Corresponding Author:

Ksenia Matlawska-Wasowska, PhD

Department of Pediatrics

Division of Pediatric Research

University of New Mexico Health Sciences Center

MSC 105590

Albuquerque, NM 87131-0001

Phone: 505-272-6177

Fax: 505-272-8826

Email: [KMatlawska-Wasowska@salud.unm.edu](mailto:KMatlawska-Wasowska@salud.unm.edu)

## Suppl. Table 1

| Patient ID | PDX ID | Origin Patient | Karyotype                                                   | Lesion   | ETP      |
|------------|--------|----------------|-------------------------------------------------------------|----------|----------|
| 15-093#    | 15-093 | UNM            | 46,XY[20]                                                   | ND       | Not ETP  |
| 12-089#    | 12-089 | UNM            | 46,XY,t(?;11)(?;q23). Ish (MLL x 2),(5'MLL sep 3'MLL x 1)   | KMT2A-R  | ND       |
| ALL82*     | PATZZM | COG            | 46,XY,t(5;14)(q35;q32)[3]/47,idem,+mar[3]/46,XY[19]         | ND       | not ETP  |
| ALL68*     | PATRAP | COG            | 46,X,add(X)(q26),del(5)(q31),t(10;11)(p12;q21)[13]/46,XX[7] | MLLT10-R | ETP      |
| ALL27*     | PASNXS | COG            | 46,XX,del(2)(q33),del(12)(p12)[20]                          | CCDC91-R | near ETP |
| ALL16*     | PASGJG | COG            | 46,Y,t(X;10)(p10;p10)[18]/46,XY[2]                          | MLLT10-R | ND       |
| ALL31*     | PASSPP | COG            | 46,XY,t(11;19)(q23;p13.3)[20]/46,XY[3]                      | KMT2A-R  | not ETP  |

**Suppl. Table 1.** Karyotypic and molecular classification of primary T-ALL samples used for the development of PDX.

# primary T-ALL samples used in this study; ND, not determined; R, rearrangements; \* reported by Matlawska-Wasowska *et al.* (2016) Leukemia.

Suppl. Table 2. List of the tested inhibitors and their clinical relevance.

| Compound     | Inhibitor type | Tested Concentration range | FDA approved | Clinical dosage |      |       | Steady state plasma concentration (Cmax) |                |        |        |               | References                                                                                                                                                                  |
|--------------|----------------|----------------------------|--------------|-----------------|------|-------|------------------------------------------|----------------|--------|--------|---------------|-----------------------------------------------------------------------------------------------------------------------------------------------------------------------------|
|              |                |                            |              | Dose            | unit | route | PlasmaConc (µM)                          | PlasmaConc (M) | MW     | Cmax   | Unit          |                                                                                                                                                                             |
| Afatinib     | TKI            | 0.005-100 µM               | yes          | 40              | mg   | O     | 0.16                                     | 1.58E-07       | 485    |        |               | <a href="https://www.ncbi.nlm.nih.gov/pmc/articles/PMC5315738/">https://www.ncbi.nlm.nih.gov/pmc/articles/PMC5315738/</a>                                                   |
| Alvocidib    | CDK            | 0.05-1000 nM               | no           | 60              | mg   | P     | 2.24                                     | 2.24E-06       | 401    |        |               | <a href="https://www.ncbi.nlm.nih.gov/pmc/articles/PMC3618599/#SD2">https://www.ncbi.nlm.nih.gov/pmc/articles/PMC3618599/#SD2</a>                                           |
| Axitinib     | TKI            | 0.005-100 µM               | yes          | 10              | mg   | O     | 0.10                                     | 9.59E-08       | 386    | 37     | nanog/milliL  | <a href="https://www.ncbi.nlm.nih.gov/pmc/articles/PMC3425526/">https://www.ncbi.nlm.nih.gov/pmc/articles/PMC3425526/</a>                                                   |
| Bortezomib   | proteasome     | 0.05-1000 nM               | yes          | 2.6             | mg   | P     | 0.23                                     | 2.25E-07       | 384.24 | 86.5   | nanog/milliL  | <a href="http://drugcentral.org/label/1521d321-e724-4ffc-adad-34bf4f44fac7/view">http://drugcentral.org/label/1521d321-e724-4ffc-adad-34bf4f44fac7/view</a>                 |
| Bosutinib    | TKI            | 0.005-100 µM               | yes          | 500             | mg   | O     | 0.38                                     | 3.77E-07       | 530    | 200    | nanog/milliL  | <a href="https://www.drugbank.ca/drugs/DB06616">https://www.drugbank.ca/drugs/DB06616</a>                                                                                   |
| Cabozantinib | TKI            | 0.005-100 µM               | yes          | 140             | mg   | O     | 0.61                                     | 6.11E-07       | 501    | 306    | nanog/milliL  | <a href="https://www.ncbi.nlm.nih.gov/pmc/articles/PMC3646303/">https://www.ncbi.nlm.nih.gov/pmc/articles/PMC3646303/</a>                                                   |
| Carfilzomib  | proteasome     | 0.05-1000 nM               | yes          | 40              | mg   | P     | 1.93                                     | 1.93E-06       | 719    | 1389   | nanog/milliL  | <a href="https://www.ncbi.nlm.nih.gov/pmc/articles/PMC5438822/">https://www.ncbi.nlm.nih.gov/pmc/articles/PMC5438822/</a>                                                   |
| Celecoxib    | TKI            | 0.005-100 µM               | yes          | 200             | mg   | O     | 1.80                                     | 1.80E-06       | 381    | 686    | nanog/milliL  | <a href="https://www.ncbi.nlm.nih.gov/pubmed/16149679">https://www.ncbi.nlm.nih.gov/pubmed/16149679</a>                                                                     |
| Ceritinib    | TKI            | 0.005-100 µM               | yes          | 750             | mg   | O     | 1.43                                     | 1.43E-06       | 558    | 800    | nanog/milliL  | <a href="https://www.ncbi.nlm.nih.gov/pmc/articles/PMC4079055/#SD1">https://www.ncbi.nlm.nih.gov/pmc/articles/PMC4079055/#SD1</a>                                           |
| Crizotinib   | TKI            | 0.005-100 µM               | yes          | 500             | mg   | O     | 0.82                                     | 8.18E-07       | 450    | 368    | nanog/milliL  | <a href="https://www.ncbi.nlm.nih.gov/pmc/articles/PMC4982581/">https://www.ncbi.nlm.nih.gov/pmc/articles/PMC4982581/</a>                                                   |
| Dabrafenib   | TKI            | 0.005-100 µM               | yes          | 300             | mg   | O     | 1.55                                     | 1.55E-06       | 519    | 806    | nanog/milliL  | <a href="https://www.ncbi.nlm.nih.gov/pmc/articles/PMC3859275/">https://www.ncbi.nlm.nih.gov/pmc/articles/PMC3859275/</a>                                                   |
| Dasatinib    | TKI            | 0.005-100 µM               | yes          | 100             | mg   | O     | 0.23                                     | 2.29E-07       | 488    | 111.6  | nanog/milliL  | <a href="https://www.ncbi.nlm.nih.gov/pubmed/22587422">https://www.ncbi.nlm.nih.gov/pubmed/22587422</a>                                                                     |
| Erlotinib    | TKI            | 0.005-100 µM               | yes          | 150             | mg   | O     | 4.40                                     | 4.40E-06       | 393    | 1.73   | microg/milliL | <a href="https://bmccancer.biomedcentral.com/articles/10.1186/1471-2407-11-284">https://bmccancer.biomedcentral.com/articles/10.1186/1471-2407-11-284</a>                   |
| Gefitinib    | TKI            | 0.005-100 µM               | yes          | 250             | mg   | O     | 0.19                                     | 1.91E-07       | 446    | 85     | nanog/milliL  | <a href="https://www.ncbi.nlm.nih.gov/pubmed/16231967">https://www.ncbi.nlm.nih.gov/pubmed/16231967</a>                                                                     |
| Ibrutinib    | TKI            | 0.005-100 µM               | yes          | 560             | mg   | O     | 0.12                                     | 1.18E-07       | 440    | 51.7   | nanog/milliL  | <a href="https://www.ncbi.nlm.nih.gov/pmc/articles/PMC4419161/">https://www.ncbi.nlm.nih.gov/pmc/articles/PMC4419161/</a>                                                   |
| Imatinib     | TKI            | 0.005-100 µM               | yes          | 400             | mg   | O     | 3.24                                     | 3.24E-06       | 493.6  | 1.6    | millig/L      | <a href="https://pdfs.semanticscholar.org/b9b0/5b7fc6cc9065ef18009e9cbde1752a6c4870.pdf">https://pdfs.semanticscholar.org/b9b0/5b7fc6cc9065ef18009e9cbde1752a6c4870.pdf</a> |
| Lapatinib    | TKI            | 0.005-100 µM               | yes          | 1250            | mg   | O     | 6.06                                     | 6.06E-06       | 581    | 3.52   | microg/milliL | <a href="https://www.ncbi.nlm.nih.gov/pmc/articles/PMC4331616/">https://www.ncbi.nlm.nih.gov/pmc/articles/PMC4331616/</a>                                                   |
| Nilotinib    | TKI            | 0.005-100 µM               | yes          | 400             | mg   | O     | 4.08                                     | 4.08E-06       | 529.5  | 2160.7 | nanog/milliL  | <a href="https://www.ncbi.nlm.nih.gov/pubmed/19695406">https://www.ncbi.nlm.nih.gov/pubmed/19695406</a>                                                                     |
| Palbociclib  | CDK            | 0.005-100 µM               | yes          | 125             | mg   | O     | 0.41                                     | 4.15E-07       | 447.5  | 185.5  | nanog/milliL  | <a href="https://www.ncbi.nlm.nih.gov/pmc/articles/PMC4968608/">https://www.ncbi.nlm.nih.gov/pmc/articles/PMC4968608/</a>                                                   |
| Ponatinib    | TKI            | 0.005-100 µM               | yes          | 45              | mg   | O     | 0.15                                     | 1.45E-07       | 532.5  |        |               | <a href="https://www.ncbi.nlm.nih.gov/pmc/articles/PMC5344956/">https://www.ncbi.nlm.nih.gov/pmc/articles/PMC5344956/</a>                                                   |
| Regorafenib  | TKI            | 0.005-100 µM               | yes          | 160             | mg   | O     | 7.15                                     | 7.15E-06       | 482.8  | 3.45   | millig/L      | <a href="https://www.ncbi.nlm.nih.gov/pmc/articles/PMC3364125/">https://www.ncbi.nlm.nih.gov/pmc/articles/PMC3364125/</a>                                                   |
| Ruxolitinib  | TKI            | 0.005-100 µM               | yes          | 20              | mg   | O     | 1.32                                     | 1.32E-06       | 306    | 1320   | nanomol/L     | <a href="http://www.bloodjournal.org/content/118/21/5162?ss_o-checked=true">http://www.bloodjournal.org/content/118/21/5162?ss_o-checked=true</a>                           |
| Saracatinib  | TKI            | 0.005-100 µM               | yes          | 175             | mg   |       | 0.82                                     | 8.19E-07       | 542    | 444    | nanog/milliL  | <a href="http://clincancerres.aacrjournals.org/content/clinicanres/16/19/4876.full.pdf">http://clincancerres.aacrjournals.org/content/clinicanres/16/19/4876.full.pdf</a>   |
| Selumetinib  | TKI            | 0.005-100 µM               | yes          | 75              | mg   |       | 1.22                                     | 1.22E-06       | 457.68 | 557    | nanog/milliL  | <a href="https://www.ncbi.nlm.nih.gov/pubmed/21953275">https://www.ncbi.nlm.nih.gov/pubmed/21953275</a>                                                                     |
| Sorafenib    | TKI            | 0.005-100 µM               | yes          | 400             | mg   | O     | 7.90                                     | 7.90E-06       | 464.8  | 3.67   | millig/L      | <a href="https://link.springer.com/article/10.1007%2Fs00280-010-1423-9">https://link.springer.com/article/10.1007%2Fs00280-010-1423-9</a>                                   |
| Sunitinib    | TKI            | 0.005-100 µM               | yes          | 50              | mg   | O     | 0.06                                     | 6.27E-08       | 398.5  | 25     | nanog/milliL  | <a href="https://onlinelibrary.wiley.com/doi/pdf/10.1002/cncr.28554">https://onlinelibrary.wiley.com/doi/pdf/10.1002/cncr.28554</a>                                         |
| Tofacitinib  | TKI            | 0.005-100 µM               | yes          | 10              | mg   | O     | 1.26                                     | 1.26E-06       | 312.3  | 392    | nanog/milliL  | <a href="http://dmd.aspetjournals.org/content/dmd/42/4/759.full.pdf">http://dmd.aspetjournals.org/content/dmd/42/4/759.full.pdf</a>                                         |
| Trametinib   | TKI            | 0.005-100 µM               | yes          | 2               | mg   | O     | 0.04                                     | 3.61E-08       | 615.4  | 22.2   | nanog/milliL  | <a href="https://www.drugbank.ca/drugs/DB08911">https://www.drugbank.ca/drugs/DB08911</a>                                                                                   |
| Vandetanib   | TKI            | 0.005-100 µM               | yes          | 300             | mg   | O     | 0.36                                     | 3.58E-07       | 475.35 | 170    | nanog/milliL  | <a href="https://www.ncbi.nlm.nih.gov/pmc/articles/PMC3586143/">https://www.ncbi.nlm.nih.gov/pmc/articles/PMC3586143/</a>                                                   |
| Vemurafenib  | TKI            | 0.005-100 µM               | yes          | 960             | mg   | O     | 9.80                                     | 9.80E-06       | 489.92 | 4.8    | microg/milliL | <a href="https://link.springer.com/article/10.1007%2Fs00280-013-2324-5">https://link.springer.com/article/10.1007%2Fs00280-013-2324-5</a>                                   |
| Vismodegib   | Hedgehog       | 0.005-100 µM               | yes          | 150             | mg   | O     | 3.58                                     | 3.58E-06       | 421    | 3.58   | micromol/L    | <a href="https://www.ncbi.nlm.nih.gov/pmc/articles/PMC3703823/">https://www.ncbi.nlm.nih.gov/pmc/articles/PMC3703823/</a>                                                   |

Suppl. Table 3

| Compound     | CUTLL1 | ALL-SIL | CCRF-CEM | Jurkat | Loucy |
|--------------|--------|---------|----------|--------|-------|
| Afatinib     | 3.30   | 4.44    | 2.57     | 2.13   | 1.91  |
| Alvocidib    | 0.02   | 0.03    | 0.08     | 0.01   | 0.01  |
| Axitinib     | 0.63   | 1.37    | 0.07     | 0.42   | 0.45  |
| Bortezomib   | 0.17   | 0.18    | 0.01     | 0.14   | 0.15  |
| Bosutinib    | 14.91  | 7.58    | 0.03     | 1.17   | 1.42  |
| Cabozantinib | 10.61  | 11.27   | 5.73     | 6.22   | 4.10  |
| Carfilzomib  | 0.03   | 0.03    | 0.00     | 0.02   | 0.02  |
| Celecoxib    | >100   | >100    | 36.29    | >100   | >100  |
| Ceritinib    | 45.46  | 7.62    | 6.32     | 3.24   | 3.03  |
| Crizotinib   | 2.26   | 6.79    | 1.91     | 2.23   | 1.90  |
| Dabrafenib   | >100   | >100    | 45.75    | >100   | >100  |
| Dasatinib    | >100   | 7.99    | 14.96    | 5.84   | 6.87  |
| Erlotinib    | >100   | 8.93    | >100     | 6.25   | 9.18  |
| Gefitinib    | 21.57  | 16.42   | 30.91    | 19.35  | 8.87  |
| Ibrutinib    | >100   | >100    | 21.59    | 18.65  | 14.75 |
| Imatinib     | 25.85  | 29.11   | 39.10    | 11.55  | 9.80  |
| Lapatinib    | 15.51  | 7.57    | 7.25     | 4.15   | 3.46  |
| Nilotinib    | >100   | >100    | >100     | 52.12  | >100  |
| Palbociclib  | >100   | >100    | >100     | >100   | >100  |
| Ponatinib    | 5.66   | 3.34    | 4.68     | 1.12   | 1.46  |
| Regorafenib  | 36.34  | 14.96   | 10.36    | 11.95  | 11.66 |
| Ruxolitinib  | 12.71  | 42.56   | 39.39    | 55.91  | 33.10 |
| Saracatinib  | >100   | 60.16   | 25.49    | 9.81   | 8.18  |
| Selumetinib  | >100   | >100    | >100     | >100   | 35.49 |
| Sorafenib    | 26.66  | 12.15   | 11.54    | 10.72  | 10.93 |
| Sunitinib    | 1.71   | 1.33    | 4.02     | 1.62   | 1.58  |
| Tofacitinib  | >100   | >100    | >100     | >100   | >100  |
| Trametinib   | >100   | >100    | 22.71    | 29.56  | 38.18 |
| Vandetanib   | >100   | >100    | 13.51    | 9.21   | 3.37  |
| Vemurafenib  | 18.55  | 9.63    | 10.31    | 8.66   | 9.32  |
| Vismodegib   | >100   | >100    | >100     | >100   | >100  |

**Suppl. Table 3.** *Ex vivo* drug response profiling of T-ALL cell lines. The cells were incubated for 72 hr with the tested agents and the EC<sub>50</sub> values were calculated from three independent experiments. EC<sub>50</sub> values were reported for inhibitors that yielded maximum response values of 20% or greater. For EC<sub>50</sub> values calculated to be beyond the concentration range tested, they were reported as >100 μM. This indicate the cells that were insensitive to the inhibitors at tested concentration range.

Suppl. Table 4

|             | 15-093 | 12-089 | PATZZM | PATRAP | PASNXS | PASGJG | PASSPP | CUTTLL1 | ALL-SIL | CCRF-CEM | Jurkat | Loucy | PBMC |
|-------------|--------|--------|--------|--------|--------|--------|--------|---------|---------|----------|--------|-------|------|
| <b>48 h</b> | 82.2   | 74.8   | 87.6   | 76.6   | 66.4   | 90.9   | 89.1   | ND      | ND      | ND       | ND     | ND    | 96.2 |
| <b>72 h</b> | 77.2   | 71.5   | 85.9   | 72.4   | 75.3   | 94.7   | 92.4   | 78.3*   | 85.7*   | 86.1*    | 87.9*  | 83.1* | 94.2 |

**Suppl. Table 4.** Cell viability (%) of T-ALL cell lines, primary samples, PDX models and PBMC at indicated time points after incubation with DMSO (<1%). \* Mean values obtained from three independent experiments. ND, not determined.

Suppl. Table 5

| Compound     | 15-093 | 12-089 | PATZZM | PATRAP | PASNXS | PASGJG | PASSPP |
|--------------|--------|--------|--------|--------|--------|--------|--------|
| Afatinib     | 10.12  | 11.09  | 9.00   | 6.76   | 4.47   | >100   | >100   |
| Alvocidib    | 0.25   | 1.19   | >100   | >100   | 48.71  | >100   | >100   |
| Axitinib     | >100   | >100   | >100   | >100   | >100   | >100   | >100   |
| Bortezomib   | >100   | >100   | >100   | >100   | >100   | >100   | >100   |
| Bosutinib    | 48.20  | 18.73  | 15.14  | 1.95   | 11.85  | >100   | >100   |
| Cabozantinib | >100   | >100   | >100   | >100   | >100   | >100   | >100   |
| Carfilzomib  | 0.01   | 0.005  | 0.006  | 0.004  | 0.012  | >100   | >100   |
| Celecoxib    | >100   | >100   | >100   | >100   | >100   | >100   | >100   |
| Ceritinib    | 13.38  | >100   | 30.21  | >100   | >100   | >100   | >100   |
| Crizotinib   | 12.21  | 12.43  | 6.75   | 9.62   | 0.07   | >100   | >100   |
| Dabrafenib   | >100   | >100   | >100   | >100   | >100   | >100   | >100   |
| Dasatinib    | >100   | >100   | >100   | 2.43   | >100   | >100   | >100   |
| Erlotinib    | >100   | >100   | >100   | >100   | >100   | >100   | >100   |
| Gefitinib    | >100   | >100   | >100   | 20.0   | >100   | >100   | >100   |
| Ibrutinib    | >100   | 54.46  | >100   | >100   | >100   | >100   | >100   |
| Imatinib     | >100   | >100   | >100   | >100   | >100   | >100   | >100   |
| Lapatinib    | >100   | 57.11  | >100   | 13.87  | >100   | >100   | >100   |
| Nilotinib    | >100   | >100   | >100   | >100   | >100   | >100   | >100   |
| Palbociclib  | >100   | >100   | >100   | >100   | >100   | >100   | >100   |
| Ponatinib    | 11.21  | 22.35  | 5.63   | 6.98   | 1.92   | >100   | >100   |
| Regorafenib  | >100   | 40.4   | >100   | >100   | >100   | >100   | >100   |
| Ruxolitinib  | >100   | >100   | >100   | >100   | >100   | >100   | >100   |
| Saracatinib  | >100   | >100   | >100   | >100   | >100   | >100   | >100   |
| Selumetinib  | >100   | >100   | >100   | >100   | 2.71   | >100   | >100   |
| Sorafenib    | >100   | >100   | 96.24  | >100   | >100   | >100   | >100   |
| Sunitinib    | 1.38   | 5.57   | 1.35   | 3.23   | 1.40   | >100   | >100   |
| Tofacitinib  | >100   | >100   | >100   | >100   | >100   | >100   | >100   |
| Trametinib   | >100   | >100   | >100   | >100   | >100   | >100   | >100   |
| Vandetanib   | 45.71  | 29.11  | 26.43  | 11.57  | >100   | >100   | >100   |
| Vemurafenib  | >100   | >100   | >100   | >100   | >100   | >100   | >100   |
| Vismodegib   | >100   | >100   | >100   | >100   | >100   | >100   | >100   |

**Suppl. Table 5.** Response of T-ALL patient samples and patient derived xenografts to 31 small molecule inhibitors. The cells were incubated for 48 hrs with the tested agents. EC<sub>50</sub> values were reported for inhibitors that yielded maximum response values of 20% or greater. The EC<sub>50</sub> values that were beyond the concentration range tested are reported as >100 μM. This indicate the cells that were insensitive to the inhibitors at tested concentrations.

Suppl. Figure 1

|              | CUTLL1 | ALL-SIL | CCRF-CEM | Jurkat | Loucy  |
|--------------|--------|---------|----------|--------|--------|
| Afatinib     | 0.514  | 0.895*  | 0.940    | 0.563  | 0.729  |
| Alvocidib    | 0.478  | 1.011   | 1.394    | 0.890* | 1.032  |
| Axitinib     | 0.464  | 0.782   | 2.118    | 1.306  | 0.627  |
| Bortezomib   | 0.630  | 0.974   | 1.261    | 0.945  |        |
| Bosutinib    | 0.989  | 1.484   | 0.780    | 0.604  | 0.544  |
| Cabozantinib | 1.619  | 0.975   | 0.856    | 2.019  | 1.063  |
| Carfilzomib  | 0.798  | 1.367*  | 1.040    | 1.231  | 1.356# |
| Celecoxib    |        |         | 0.902    |        |        |
| Ceritinib    |        | 1.032   | 1.092    | 0.849  | 0.860  |
| Crizotinib   | 0.293  | 0.562   | 0.799    | 0.536  | 0.959  |
| Dabrafenib   |        |         |          |        |        |
| Dasatinib    |        | 0.859   | 0.977    | 0.807  | 1.219  |
| Erlotinib    |        | 0.848   |          | 0.837  | 1.103  |
| Gefitinib    | 1.092  | 0.844   | 1.170    | 1.916  | 0.863* |
| Ibrutinib    |        |         | 0.840    | 0.856  | 0.563  |
| Imatinib     | 1.528  | 1.591   | 1.473    | 1.638  | 1.338  |
| Lapatinib    | 0.854# | 0.812   | 0.851    | 1.026  | 0.686  |
| Nilotinib    |        |         |          |        |        |
| Palbociclib  |        |         |          |        |        |
| Ponatinib    | 0.801  | 0.834   | 0.972    | 0.936  | 1.205  |
| Regorafenib  | 0.392  | 0.770   | 0.809    | 0.897  | 0.926  |
| Ruxolitinib  | 1.081  | 1.122   | 1.401    | 1.373  | 1.003  |
| Saracatinib  |        | 1.376   | 1.071    | 1.080  | 0.369  |
| Selumetinib  |        |         |          |        |        |
| Sorafenib    | 0.537* | 0.837   | 0.903    | 0.854  | 0.890  |
| Sunitinib    | 1.406  | 1.080   | 1.329#   | 1.306  | 1.216  |
| Tofacitinib  |        |         |          |        |        |
| Trametinib   |        |         | 0.849    | 0.380  |        |
| Vandetanib   |        |         | 1.117    | 1.022  | 0.695  |
| Vemurafenib  |        | 0.829   |          | 0.534  | 0.658  |
| Vismodegib   |        |         |          |        |        |

**Suppl. Figure 1.** Hypoxia Cytotoxicity Ratio (HCR) for a panel of T-ALL cell lines treated with 31 inhibitors under normoxia and hypoxia conditions, respectively (72 hr). HCR was determined for each drug and cell line as  $EC_{50}^{normoxia}/EC_{50}^{hypoxia}$ . Each HCR was calculated from mean  $EC_{50}$  values for three independent experiments (paired Student's t test, \* p < 0.05; # p < 0.07).

## Suppl. Figure 2

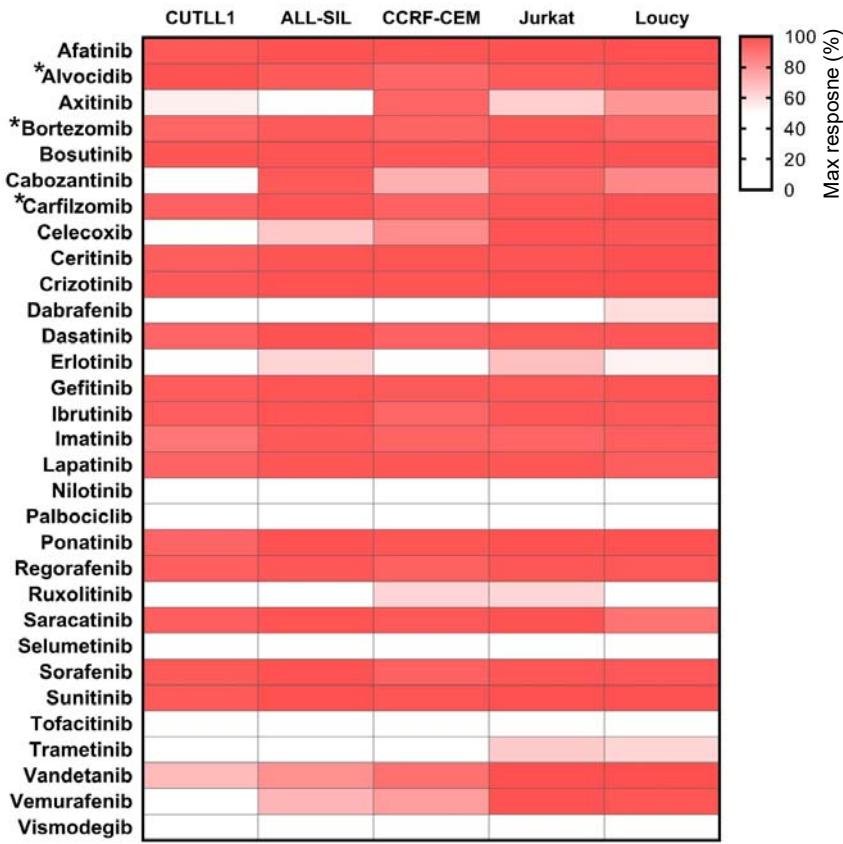

**Suppl. Figure 2.** Response of T-ALL cell line to the highest tested dose of each inhibitor under hypoxia (100  $\mu$ M for each drug with exception of \*alvocidib, \*bortezomib and \*carfilzomib for which the highest tested dose was 1  $\mu$ M). Heatmap indicates the percentage of dead cells (0 -100%).



Suppl. Figure 3

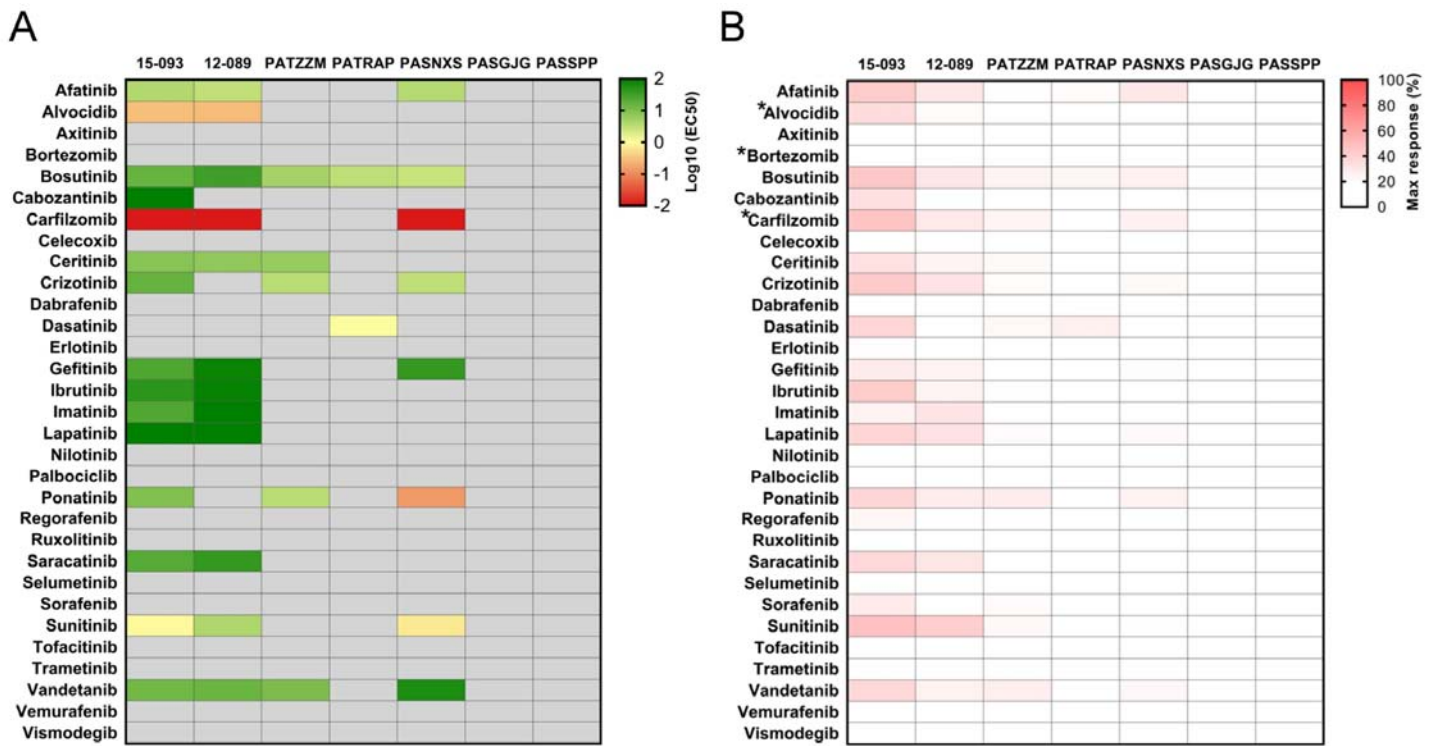

**Suppl. Figure 3. (A)** The heatmap represents the mean  $EC_{50}$  values obtained for the samples treated with the drugs for 72 hr under normoxic conditions. The columns indicate T-ALL samples and the rows indicate the tested drugs. The darkest red indicates the most sensitivity (lowest  $EC_{50}$  values) of the cells to the tested inhibitors.  $EC_{50}$  values are only reported for compounds that yielded a maximum response values of 20% or greater. For those samples which yielded maximal responses < 20% and/or had  $EC_{50}$  values greater than 100  $\mu$ M, we report those  $EC_{50}$  values as “100  $\mu$ M” (light grey). **(B)** Response of T-ALL patient samples and PDX to the highest tested dose of each inhibitor (100  $\mu$ M for each drug with exception of \*alvocidib, \*bortezomib and \*carfilzomib for which the highest tested dose was 1  $\mu$ M). Heatmap indicates the percentage of dead cells after 72 hr incubation.

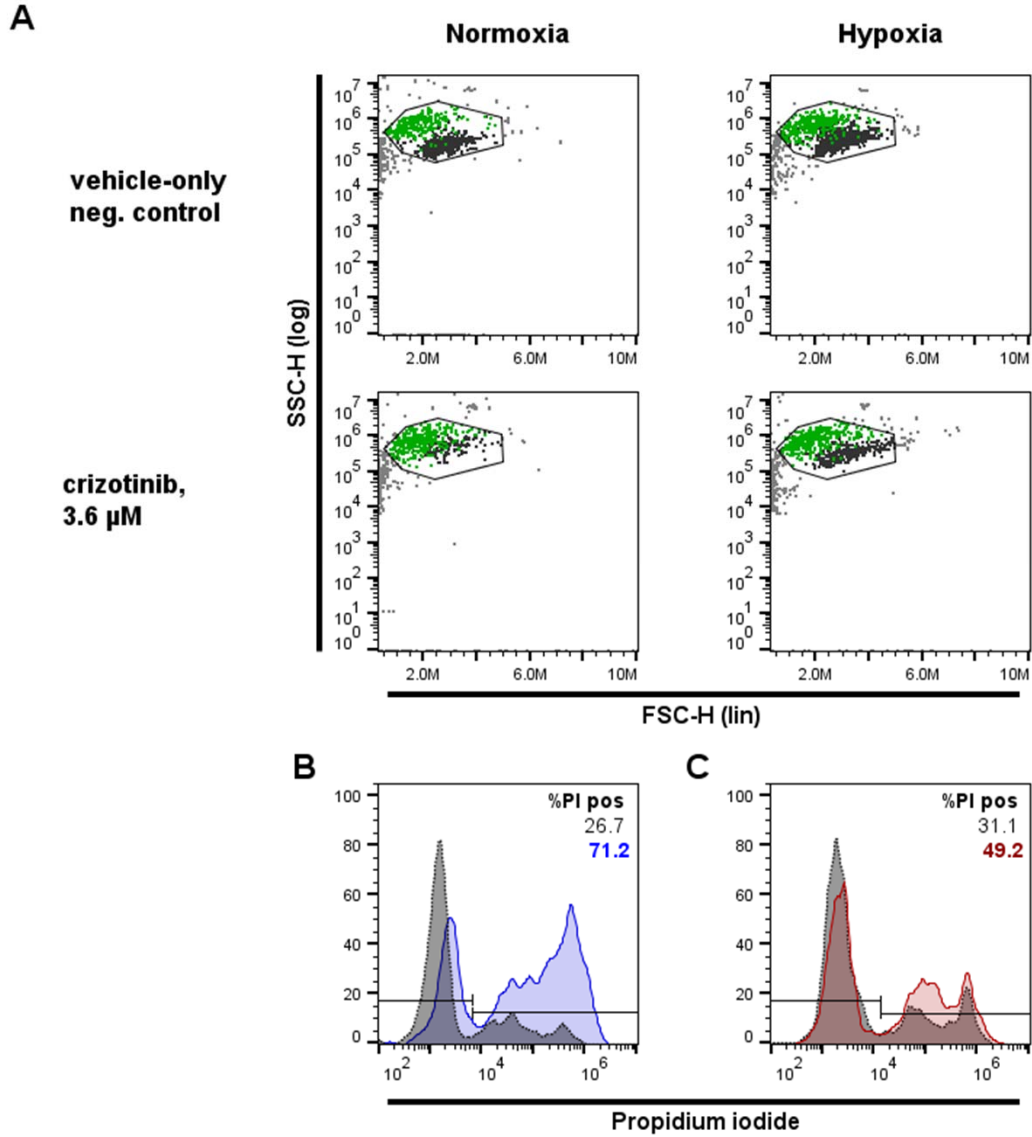

**Suppl. Figure 4.** The HTFC PI assay provides information on the morphological shift that occurs in cells treated with the tested inhibitors. Shown are data from one replicate experiment of CUTLL1 cells incubated with vehicle or TKIs for 72 h in normoxia or hypoxia conditions, then interrogated with the HTFC PI assay. **(A)** Forward- and side-scatter plots of CUTLL1 cells from individual wells in the assay at different conditions. Gated cells that were PI-positive cells are shown in green. Top panels, vehicle-only negative control. Bottom panels, wells treated with 3.6 μM crizotinib. Left panels, wells from the assay plate incubated at normoxia. Right panels, wells from the assay plate incubated in hypoxia. **(B-C)** PI stain histograms from the wells shown in (A). The gated % PI-positive values are shown on the upper right. Grey, negative control well for that oxygen incubation condition. (B) Wells incubated in normoxia. Blue, well treated with 3.6 μM crizotinib. (C) Wells incubated in hypoxia. Red, well treated with 3.6 μM crizotinib.

# Suppl. Figure 5

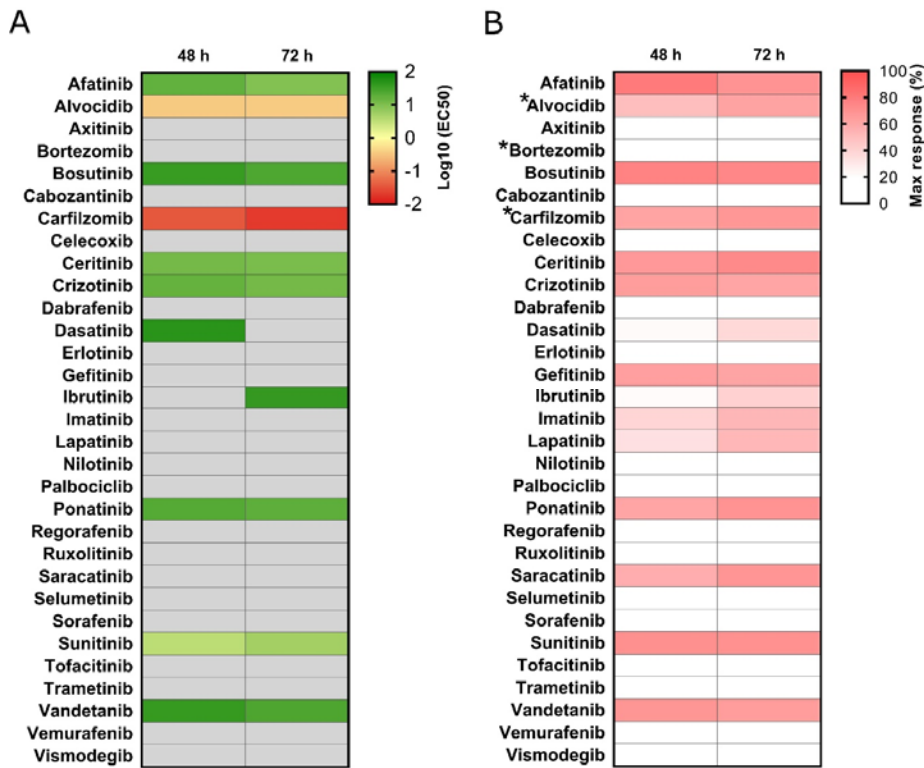

**Suppl. Figure 5.** Sensitivity of peripheral blood mononuclear cells (PBMC) to 31 small molecule inhibitors. **(A)** The heatmap represents the mean  $EC_{50}$  values obtained for normal PBMC treated with the drugs for 42 and 72 hr under normoxic conditions. The columns indicate time points and the rows indicate the tested drugs. The darkest red indicates the most sensitivity (lowest  $EC_{50}$  values) of the cells to the tested inhibitors. Light grey, the dose responses indicated  $EC_{50} > 100 \mu M$  indicating limited/lack of response to the tested compounds. **(B)** Response to the highest tested dose of each inhibitor ( $100 \mu M$  for each drug with exception of \*alvociclib, \*bortezomib and \*carfilzomib for which the highest tested dose was  $1 \mu M$ ). Heatmap indicates the percentage of dead cells after 48 and 72 hr incubation.
